# Supplementary material for: Evaluation of a method to measure HHV-6B infection in vitro based on cell size
Source: Springer Nature journal article supplement (doi:10.1186/s12985-017-0917-z), 2018-01-05

Size

(average diameter,  $\mu\text{m}$ )

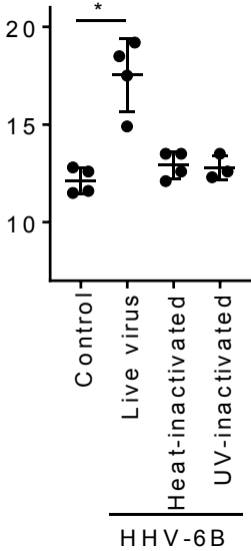

Supplement: MOESM1 [file 15347298]
