# Supplementary material for: Evaluation of a method to measure HHV-6B infection in vitro based on cell size
Source: Springer Nature journal article supplement (doi:10.1186/s12985-017-0917-z), 2018-01-05
Supplement: MOESM3 [file 15347298]

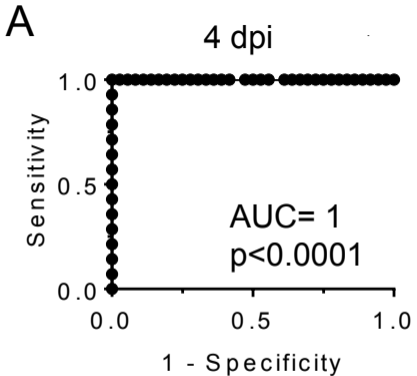

Cutoff 43.4%  
(100% sensitivity and specificity)

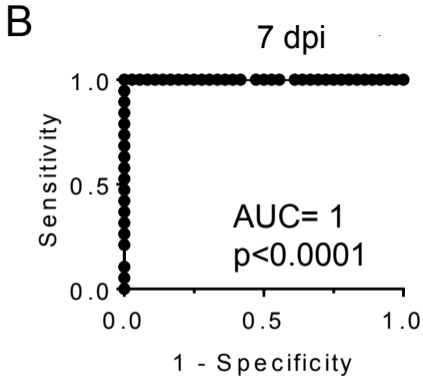

Cutoff 42.1%  
(100% sensitivity and specificity)
