# Supplementary material for: Evaluation of a method to measure HHV-6B infection in vitro based on cell size
Source: Springer Nature journal article supplement (doi:10.1186/s12985-017-0917-z), 2018-01-05

### Virus dose

Imaging-based cell counter (Cellometer Auto T4)

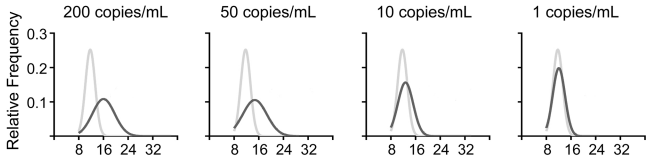

Size (cell diameter,  $\mu\text{m}$ )

Flow Cytometer (BD Biosciences LRSII)

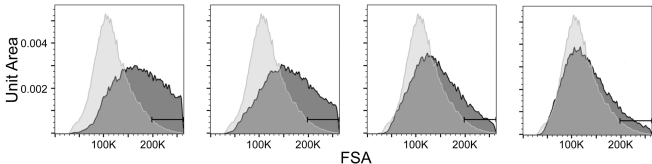

Supplement: MOESM4 [file 15347298]
